# Supplementary material for: Investigation of adsorptive orientation state change of anionic porphyrin with the hydrolysis reaction of α-tricalcium phosphate
Source: Royal Society of Chemistry journal article supplement (doi:10.1039/d2ce00505k), 2022-01-01
Supplement: d2ce00505k1.pdf [file d2ce00505k1.pdf]

## ***Electronic Supplementary Information***

### **Investigation of Adsorptive Orientation State Change of Anionic Porphyrin with Hydrolysis Reaction of $\alpha$ -Tricalcium Phosphate**

Daichi Noda,<sup>1</sup> Norio Saito,<sup>2</sup> Iori Yamada,<sup>1</sup> Motohiro Tagaya<sup>1,\*</sup>

*<sup>1</sup> Department of Materials Science and Technology, Nagaoka University of Technology,  
1603-1 Kamitomioka, Nagaoka, Niigata 940-2188, Japan*

*<sup>2</sup> Department of Industrial Chemistry, Faculty of Engineering, Tokyo University of Science,  
1-3 Kagurazaka, Shinjuku, Tokyo 162-8601, Japan*

---

**\* Author to whom correspondence should be addressed:**

Tel: +81-258-47-9345; Fax: +81-258-47-9300, E-mail: tagaya@mst.nagaokaut.ac.jp

**Scheme S1**

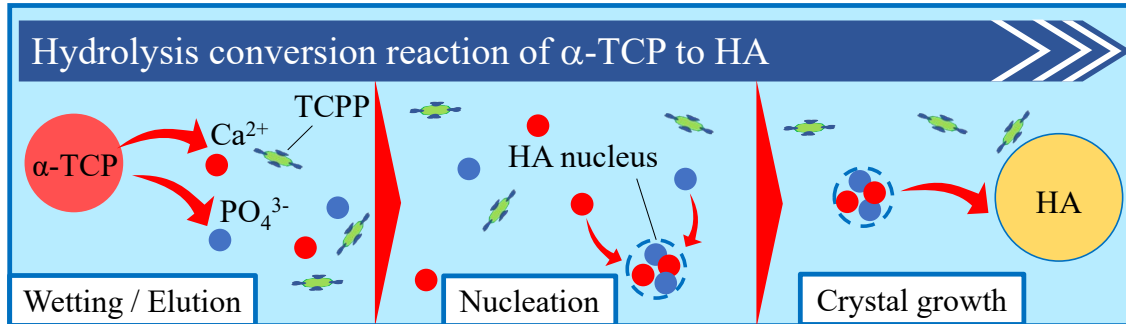

**Scheme S1.** Illustration of hydrolysis conversion reaction from  $\alpha$ -TCP to HA in this study.

## **Experimental Procedure S1**

The Soret band of samples were separated into peak I–III. The position of peak I, peak II and peak III were 411–414 nm, 421–427 nm and 375–380 nm. All the deconvolutions were performed by fitting the Gaussian function using the software SOLVER option (Excel 2016). In the SOLVER calculation, the generalized reduced gradient method was used until all the constraints were satisfied. The deconvolutions were optimized until the sum of the residual squares of the measured and synthesized data was minimized. The error was within 3% in all samples.

The peak I position (411–414 nm) is close to the Soret band (B(0,0)) of TCPP (410 nm) and TCPP<sup>4-</sup> (413 nm). Accordingly, TCPP was considered to be present as the mono-anion to tri-anion adsorption state on HA/TC. Thus, the peak I could be assignable to the vertically-adsorbed TCPP, taking into account that the carboxylate ion of citric acid can vertically be replaced with PO<sub>4</sub> site on HA.<sup>S1</sup>

The peak II position (421–427 nm) is close to the Soret band (B(0,0)) of TCPP<sup>2+</sup> (430 nm). Here, TCPP<sup>2+</sup> does not exist in the aqueous solution at pH 7.0 in this study. The peak II seems to be due to the TCPP with an electronic state similar to the TCPP<sup>2+</sup> owing to the interacting with Ca<sup>2+</sup> site at the porphyrin ring. Moreover, as a result of the assuming of the interaction state between Ca<sup>2+</sup> site and the porphyrin ring on the HA surface, we speculated that the peak II was assignable to TCPP adsorbed in the horizontal state by the interaction of Ca<sup>2+</sup> ion and carboxylate ion at diagonal two end groups.

The peak III was assignable to the electronic transition of B(1,0).<sup>2</sup>

---

### **Reference**

- S1 M. R. T. Filgueiras, D. Mkhonto and N. H. de Leeuw, *J. Cryst. Growth*, 2006, **294**, 60–68.  
S2 S. E. Clarke, C. C. Wamser and H. E. Bell, *J. Phys. Chem. A*, 2002, **106**, 3235–3242.

Figure S1

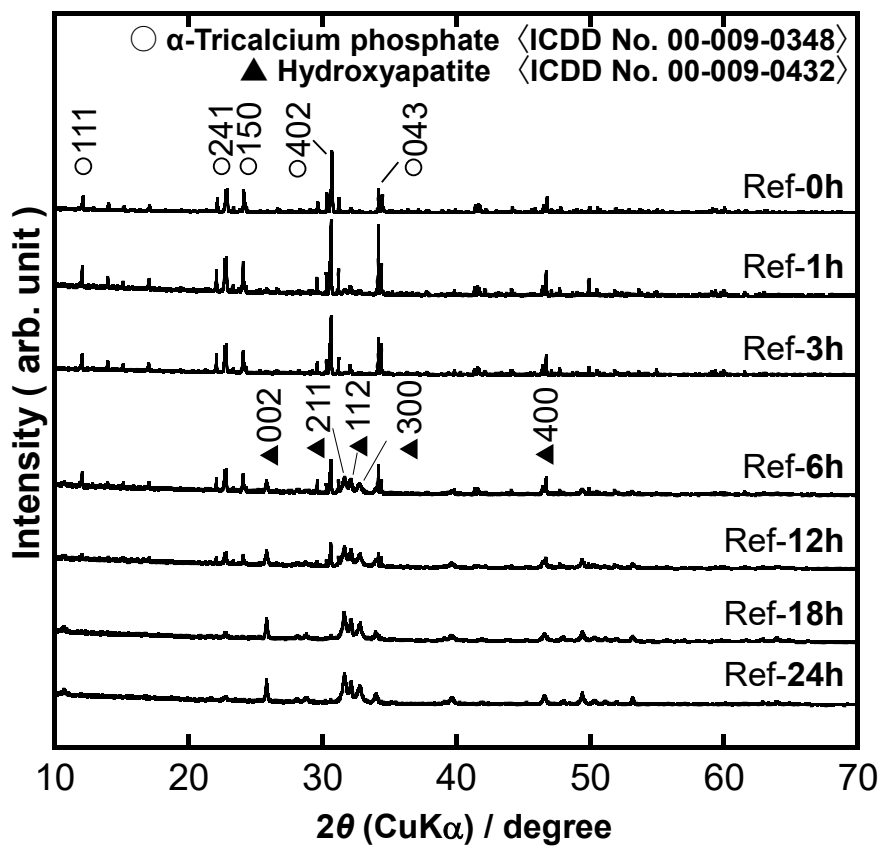

Figure S1. XRD patterns of Ref- $X$  h ( $X = 0, 1, 3, 6, 12, 18, 24$ ), and all the patterns can be attributed to  $\alpha$ -TCP or HA.

**Figure S2**

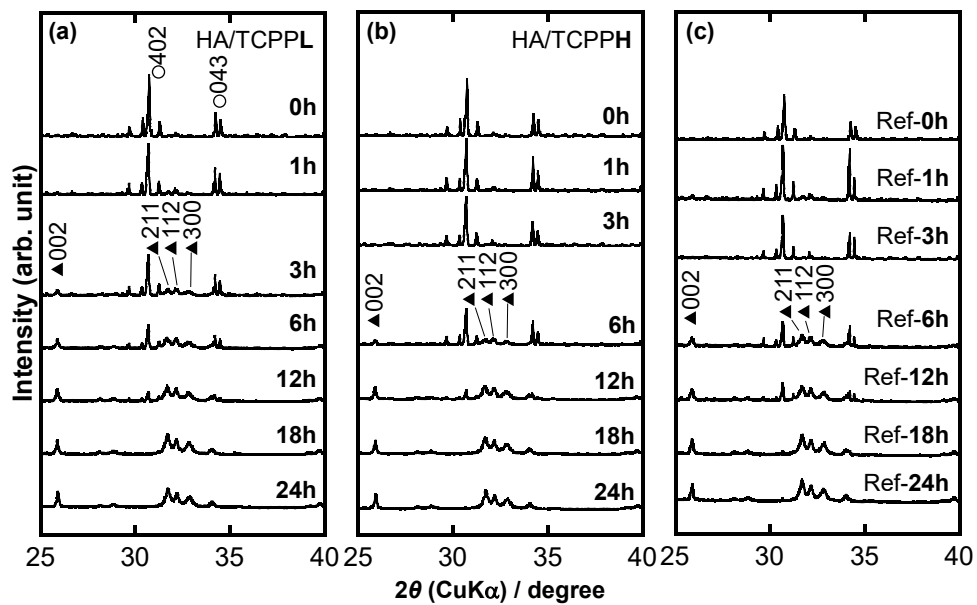

**Figure S2.** XRD patterns of (a) HA/TCPPL-Xh, (b) HA/TCPPH-Xh and Ref-Xh ( $X = 0, 1, 3, 6, 12, 18, 24$ ) at the range of 25-40 degree, and all the patterns can be attributed to (○)  $\alpha$ -TCP (ICDD No. 00-009-0348) and/or (▲) HA (ICDD No. 00-009-0432).

**Figure S3**

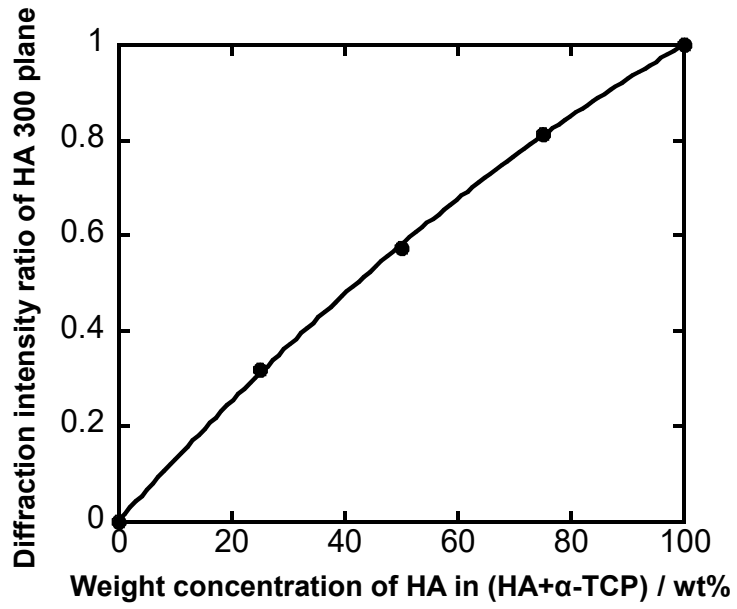

**Figure S3.** Diffraction intensity ratio of HA 300 plane with the HA content in the mixture of HA with  $\alpha$ -TCP, where the relationship was regarded as the quadratic approximation equation ( $y = -3 \times 10^{-5}x^2 + 0.0132x + 0.0024$ ,  $R^2=0.9999$ ).

**Figure S4**

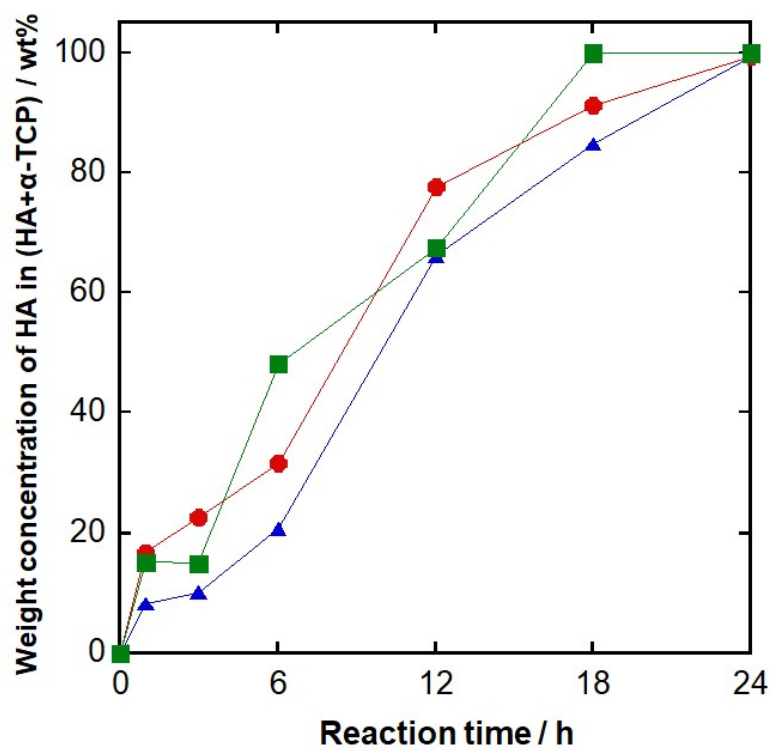

**Figure S4.** Weight concentration of HA in (●) HA/TCPPL, (▲) HA/TCPPH and (■) Ref. from the calibration curve (Fig. S3, ESI).

**Figure S5**

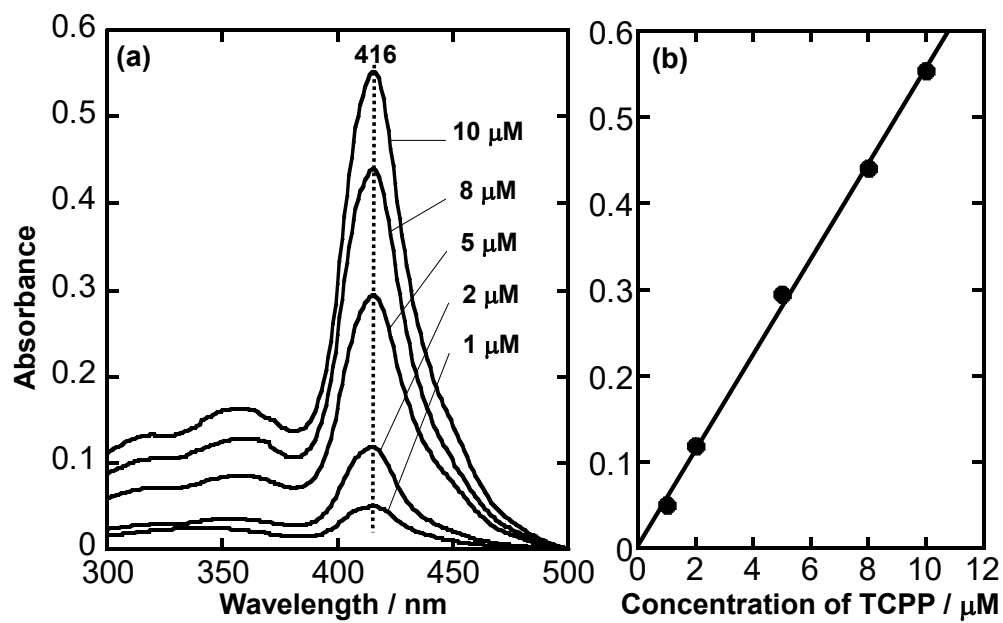

**Figure S5.** (a) UV-Visible absorption spectra in the HCl aqueous solution with the different concentrations of TCPP, and (b) the calibration curve between the concentration and absorbance ( $y=0.0551x + 0.0044$ ,  $R^2=0.9981$ ).



**Figure S6**

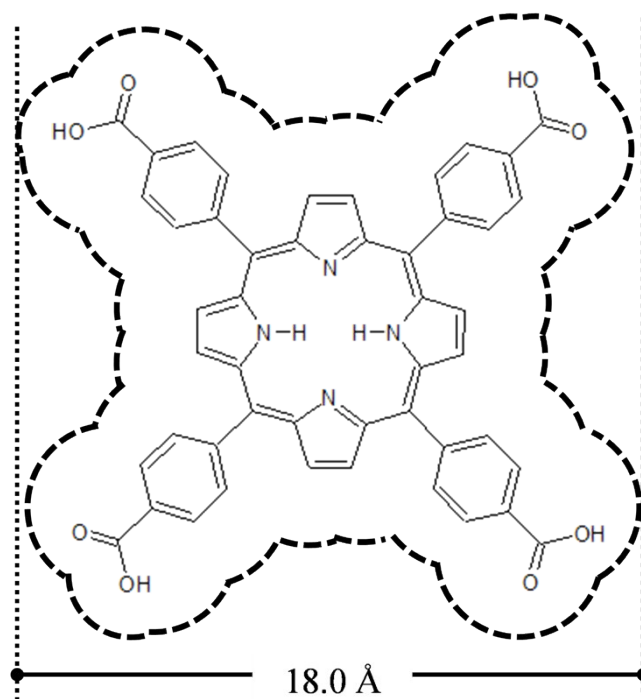

**Figure S6.** Molecular structure and diameter of TCPP.

**Figure S7**

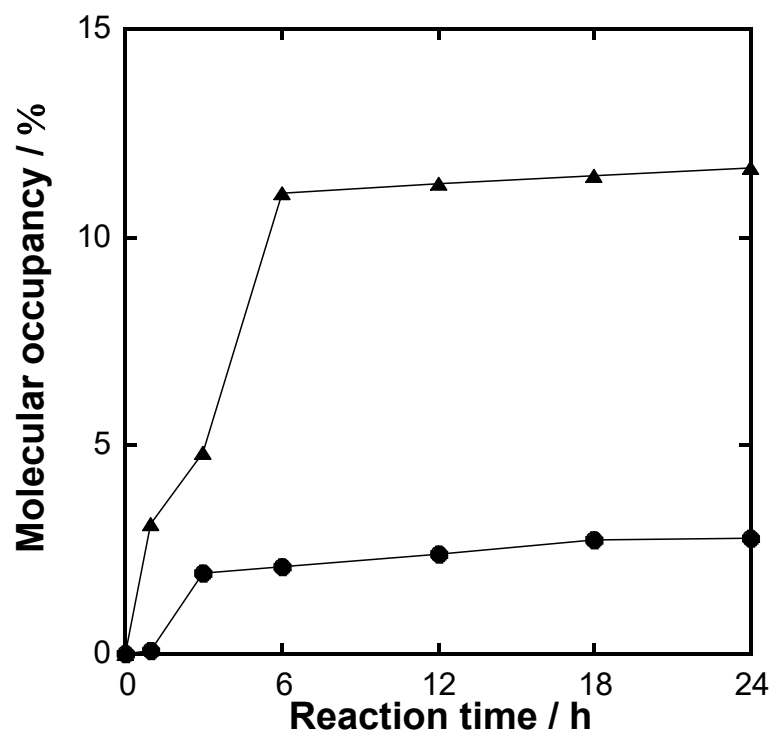

**Figure S7.** TCPP molecular occupancy adsorbed on (●) HA/TCPPPL and (▲) HA/TCPPH.

### **Equation (S1)**

The molecular occupied cross-sectional area of TCPP was calculated as a square shape with a side length of 18.8 Å in **Figure S5, ESI**. The TCPP molecular occupancy on the particle surface was calculated by the following equation (2).

$$\text{Molecular occupancy} = \frac{3.24 \times 10^{-18} \cdot M_a \cdot N_A}{2.27 \cdot (1 - R_{HA}) + 29.0 \cdot R_{HA}} \quad (\text{S1})$$

Here, the  $N_A$  is Avogadro's constant,  $M_a$  is the adsorbed amount of TCPP, and  $R_{HA}$  is the volume ratio of HA on the produced particles.

**Figure S8**

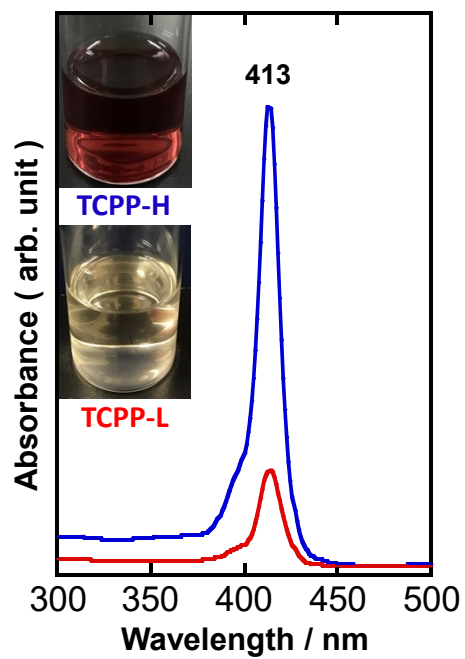

**Figure S8.** UV-Visible absorption spectra of (red line) TCPP-L (conc. 1  $\mu\text{M}$ ) and (blue line) TCPP-H (conc. 100  $\mu\text{M}$ ), and (inset) their apparent solution photographs.

**Figure S9**

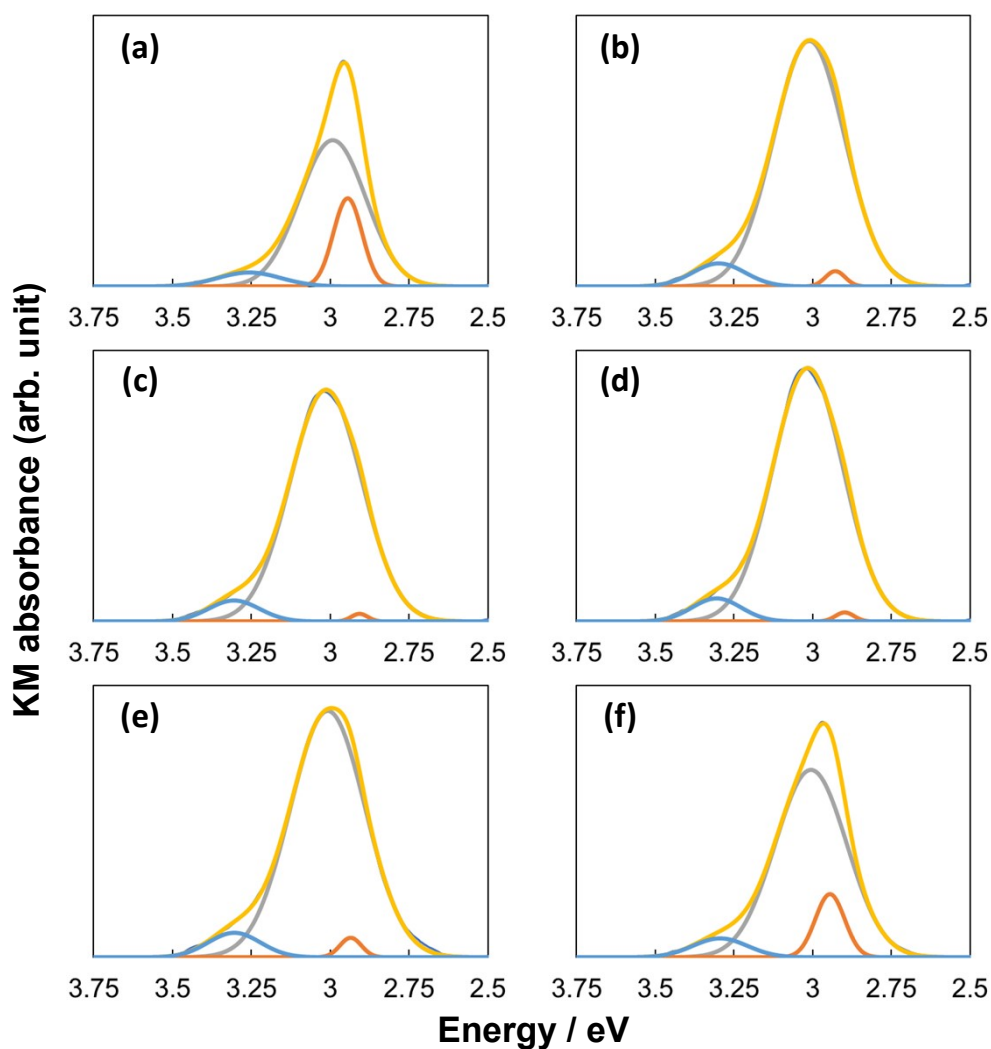

**Figure S9.** Deconvolution results of UV-Visible absorption spectra attributed to the Soret band of HA/TCPPL- $X$ h ( $X$  = (a) 1, (b) 3, (c) 6, (d) 12, (e) 18, (f) 24). The spectra were separated and fitted to horizontal and vertical molecular adsorption states of TCPPL, and the electronic transition (B(1,0)), which were represented by orange and gray, and light-blue colored lines. Here, the raw and summation spectra were represented by blue and yellow colored lines, respectively.

**Figure S10**

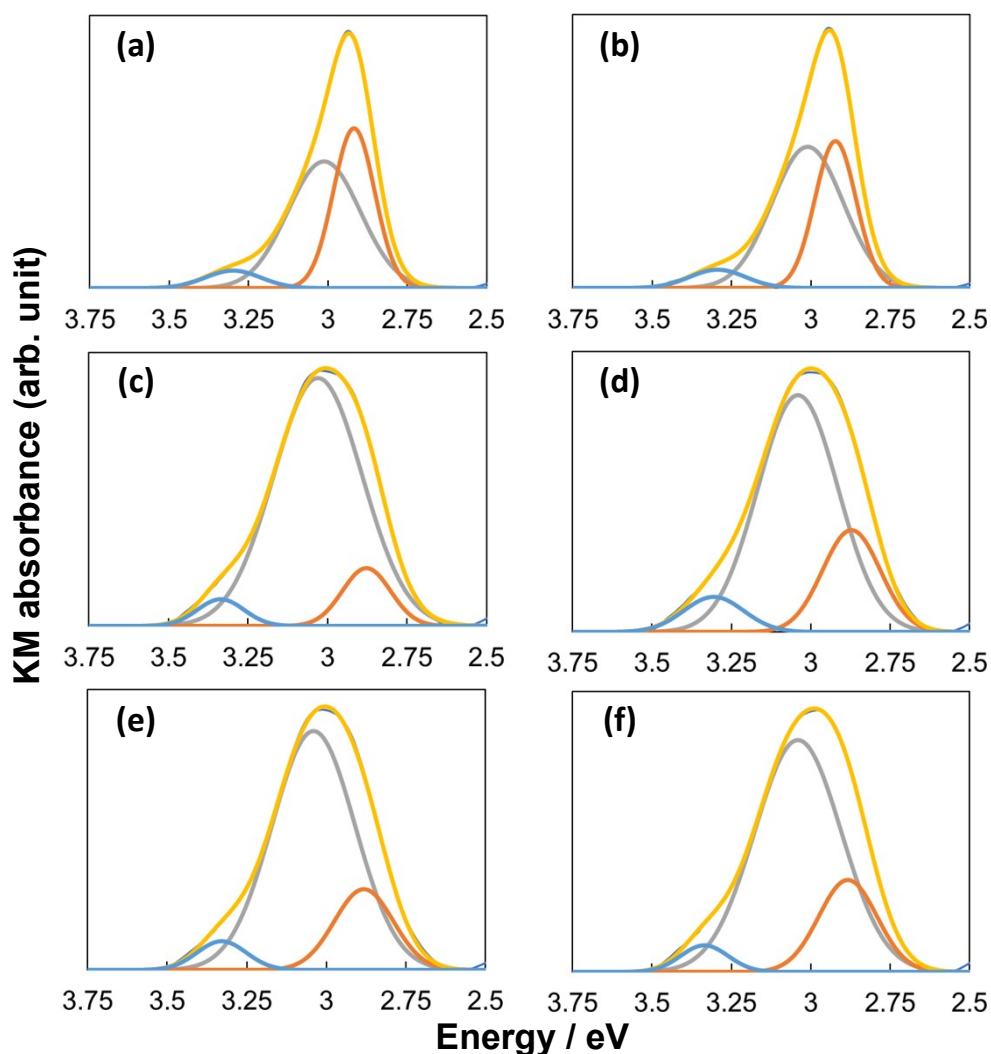

**Figure S10.** Deconvolution results of UV-Visible absorption spectra attributed to the Soret band of HA/TCPPH-**X**h (**X** = (a) 1, (b) 3, (c) 6, (d) 12, (e) 18, (f) 24). The spectra were separated and fitted to horizontal and vertical molecular adsorption states of TCPP, and the electronic transition (B(1,0)), which were represented by orange and gray, and light-blue colored lines. Here, the raw and summation spectra were represented by blue and yellow colored lines, respectively.
